# Supplementary material for: Fenton reaction-driven pro-oxidant synergy of ascorbic acid and iron oxide nanoparticles in MIL-88B(Fe)
Source: Royal Society of Chemistry journal article supplement (doi:10.1039/d4nj00963k), 2024-01-01
Supplement: d4nj00963k1.pdf [file d4nj00963k1.pdf]

Scherrer equation for spherically-shaped particles:

(S1)

$$D \text{ (nm)} = \frac{0.89 \cdot \lambda}{\Delta 2\theta \cdot \cos(\theta)}$$

Where  $\lambda$  - X-ray source wavelength. nm

$\Delta 2\theta$  - peak width at half its height. °

Table S1

Parameters of the Mössbauer spectra for the samples.

| Temperature<br>. K | Sample                                         | № | 77.7±0.3      |                                   |                       |                  |             |               | 296±3           |                                   |                       |                  |             |               | D<br>nm       | $\delta$ in Fe <sub>3</sub> O <sub>4</sub> | Compound                           |
|--------------------|------------------------------------------------|---|---------------|-----------------------------------|-----------------------|------------------|-------------|---------------|-----------------|-----------------------------------|-----------------------|------------------|-------------|---------------|---------------|--------------------------------------------|------------------------------------|
|                    |                                                |   | $\delta$      | $\epsilon$ ( $\Delta=2\epsilon$ ) | $\Gamma_{\text{exp}}$ | $H_{\text{eff}}$ | S           | $\alpha$      | $\delta$        | $\epsilon$ ( $\Delta=2\epsilon$ ) | $\Gamma_{\text{exp}}$ | $H_{\text{eff}}$ | S           | $\alpha$      |               |                                            |                                    |
|                    |                                                |   | mm/s          |                                   | kOe                   | %                |             | mm/s          |                 | kOe                               | %                     |                  |             |               |               |                                            |                                    |
|                    | MOF**                                          | 1 | 0.52±0.0<br>1 | (0.73±0.06<br>)                   | 0.54±0.0<br>1         | 80±20            |             | 0.41±0.0<br>1 | (0.7±0.1<br>)   | 0.62±0.0<br>1                     | 80±30                 |                  |             |               |               |                                            |                                    |
|                    |                                                | 2 | 0.53±0.0<br>1 | (0.44±0.02<br>)                   | 0.30±0.0<br>7         | 20±20            |             | 0.41±0.0<br>1 | (0.45±0.05<br>) | 0.4±0.2                           | 20±30                 |                  |             |               |               |                                            |                                    |
|                    | Fe <sub>3</sub> O <sub>4</sub> -<br>MOF        | 1 | 0.51±0.0<br>1 | 0.07±0.01                         | 0.23±0.0<br>4         | 529.4±0.<br>7    | 28±8        | 7.3±0.<br>1   | 0.27±0.0<br>1   | 0.01±0.01                         | 0.47±0.0<br>1         | 485.3±0.<br>3    | 63±7        | 3.66±0.0<br>3 | 2.01±0.0<br>1 | 0.317±0.00<br>8                            | Fe <sub>2.683</sub> O <sub>4</sub> |
|                    |                                                | 2 | 0.52±0.0<br>2 | -0.11±0.03                        | 0.39±0.0<br>2         | 525.5±0.<br>6    | 34±6        |               | 0.47±0.0<br>2   | -0.04±0.01                        | 0.41±0.0<br>4         | 484.4±0.<br>6    | 24±7        |               |               |                                            |                                    |
|                    |                                                | 3 | 0.30±0.0<br>1 | 0.03±0.01                         | 0.38±0.0<br>2         | 522.0±0.<br>8    | 37±5        |               | 0.28±0.0<br>2   | -0.03±0.02                        | 0.76±0.0<br>8         | 172±2            | 5.9±0.<br>3 |               |               |                                            |                                    |
|                    |                                                | 4 | 0.40±0.0<br>4 | (0.65±0.01<br>)                   | 0.57±0.0<br>1         |                  | 1.3±0.<br>1 |               | 0.33±0.0<br>1   | (0.65±0.01<br>)                   | 0.56±0.0<br>1         |                  | 6.8±0.<br>1 |               |               |                                            |                                    |
|                    | Fe <sub>3</sub> O <sub>4</sub> -<br>AA-<br>MOF | 1 | 0.61±0.0<br>3 | 0.01±0.01                         | 0.32±0.0<br>6         | 518±2            | 15±5        | 2.0±0.<br>5   | 0.33±0.0<br>4   | -0.02±0.03                        | 0.8±0.1               | 470±10           | 52±1        | 0.5±0.2       | 3.5±0.4       | 0.290±0.00<br>8                            | Fe <sub>2.710</sub> O <sub>4</sub> |
|                    |                                                | 2 | 0.37±0.0<br>2 | -0.01±0.01                        | 0.39±0.0<br>4         | 513±1            | 31±6        |               | 0.37±0.0<br>1   | (1.03±0.08<br>)                   | 0.53±0.0<br>4         |                  | 25±7        |               |               |                                            |                                    |
|                    |                                                | 3 | 0.49±0.0<br>1 | (0.91±0.06<br>)                   | 0.57±0.0<br>2         |                  | 42±7        |               | 0.39±0.0<br>1   | (0.62±0.04<br>)                   | 0.43±0.0<br>3         |                  | 23±7        |               |               |                                            |                                    |
|                    |                                                | 4 | 0.51±0.0<br>1 | (0.55±0.03<br>)                   | 0.35±0.0<br>6         |                  | 11±7        |               |                 |                                   |                       |                  |             |               |               |                                            |                                    |

\* $\delta$  — the isomeric shift.  $\Delta$  — the quadrupole splitting.  $\Gamma_{\text{exp}}$  — the linewidth.  $H_{\text{eff}}$  — the hyperfine magnetic field. S — the relative area of the subspectrum.  $\alpha$  — the quotient of particle anisotropy energy to thermal energy. D - magnetic domain diameter.

\*\* The hyperfine parameters for this sample were determined from the experimental spectrum obtained in a narrow speed range. The spectra in Figure MS1 (a.d) are for illustration purposes only.

Table S2. Concentrations of elements in the samples. at.%.

| Element \ Sample | MOF  | Fe <sub>3</sub> O <sub>4</sub> -MOF | Fe <sub>3</sub> O <sub>4</sub> -AA-<br>MOF |
|------------------|------|-------------------------------------|--------------------------------------------|
| Iron (Fe)        | 5.8  | 18.7                                | 6.4                                        |
| Oxygen (O)       | 33.5 | 76.8                                | 44.2                                       |
| Carbon (C)       | 60.7 | 4.5                                 | 49.4                                       |

Table S3. parameters of spectra deconvolution of MOF. Fe<sub>3</sub>O<sub>4</sub>-MOF and Fe<sub>3</sub>O<sub>4</sub>-AA-MOF samples.

| Sample | Bond                                      | E <sub>b</sub> . eV | FWHM. eV | Bond<br>portion. at.% |
|--------|-------------------------------------------|---------------------|----------|-----------------------|
| MOF    | Fe <sup>2+</sup> (2p <sub>3/2</sub> )     | 710.0               | 2.88     | 22.25                 |
|        | Fe <sup>2+</sup> (2p <sub>1/2</sub> )     | 723.6               | 2.88     | 11.13                 |
|        | Fe <sup>3+</sup> (2p <sub>3/2</sub> )     | 712.1               | 4.45     | 25.10                 |
|        | Fe <sup>3+</sup> (2p <sub>1/2</sub> )     | 726.3               | 4.45     | 9.94                  |
|        | Fe <sup>2+</sup> sat (2p <sub>3/2</sub> ) | 715.5               | 4.56     | 13.51                 |
|        | Fe <sup>2+</sup> sat (2p <sub>1/2</sub> ) | 729.0               | 4.56     | 4.13                  |
|        | C-C                                       | 284.6               | 1.94     | 71.91                 |

|                                        |                                           |       |        |       |
|----------------------------------------|-------------------------------------------|-------|--------|-------|
|                                        | C-OH                                      | 286.2 | 1.94   | 2.46  |
|                                        | C=O                                       | 288.5 | 1.94   | 22.72 |
|                                        | pi-pi* satellite                          | 291.2 | 1.94   | 2.90  |
|                                        | Fe-OOH                                    | 530.0 | 2.19   | 14.85 |
|                                        | Fe-O                                      | 531.2 | 2.19   | 21.93 |
|                                        | Fe-OH ads.                                | 531.8 | 2.19   | 63.22 |
| Fe <sub>3</sub> O <sub>4</sub> -MOF    | Fe <sup>2+</sup> (2p <sub>3/2</sub> )     | 709.9 | 3.22   | 19.54 |
|                                        | Fe <sup>2+</sup> (2p <sub>1/2</sub> )     | 723.5 | 3.21   | 9.77  |
|                                        | Fe <sup>3+</sup> (2p <sub>3/2</sub> )     | 711.9 | 4.15   | 18.48 |
|                                        | Fe <sup>3+</sup> (2p <sub>1/2</sub> )     | 725.8 | 4.15   | 9.96  |
|                                        | Fe <sup>2+</sup> sat (2p <sub>3/2</sub> ) | 715.4 | 6.25   | 13.48 |
|                                        | Fe <sup>2+</sup> sat (2p <sub>1/2</sub> ) | 729.0 | 6.25   | 5.65  |
|                                        | Fe <sup>3+</sup> sat (2p <sub>3/2</sub> ) | 719.9 | 6.32   | 16.73 |
|                                        | Fe <sup>3+</sup> sat (2p <sub>1/2</sub> ) | 732.3 | 6.32   | 6.39  |
|                                        | C-C                                       | 284.6 | 1.94   | 71.91 |
|                                        | C-OH                                      | 286.2 | 1.94   | 2.46  |
| C=O                                    | 288.5                                     | 1.94  | 22.72  |       |
| O-C=O                                  | 293.1                                     | 2.82  | 5.84   |       |
| Fe-OOH                                 | 530.3                                     | 2.77  | 100.00 |       |
| Fe <sub>3</sub> O <sub>4</sub> -AA-MOF | Fe <sup>2+</sup> (2p <sub>3/2</sub> )     | 710.6 | 3.22   | 32.98 |
|                                        | Fe <sup>2+</sup> (2p <sub>1/2</sub> )     | 724.2 | 3.22   | 13.07 |
|                                        | Fe <sup>3+</sup> (2p <sub>3/2</sub> )     | 712.9 | 4.01   | 16.52 |
|                                        | Fe <sup>3+</sup> (2p <sub>1/2</sub> )     | 726.2 | 4.01   | 7.78  |
|                                        | Fe <sup>2+</sup> sat (2p <sub>3/2</sub> ) | 716.2 | 8.05   | 12.69 |
|                                        | Fe <sup>2+</sup> sat (2p <sub>1/2</sub> ) | 730.2 | 4.08   | 1.8   |
|                                        | Fe <sup>3+</sup> sat (2p <sub>3/2</sub> ) | 720.9 | 8.05   | 12.1  |
|                                        | Fe <sup>3+</sup> sat (2p <sub>1/2</sub> ) | 733.2 | 4.08   | 3.07  |
|                                        | C-C                                       | 284.6 | 1.93   | 65.4  |
|                                        | C-OH                                      | 286.6 | 1.93   | 7.47  |
|                                        | C=O                                       | 288.6 | 1.93   | 22.98 |
|                                        | pi-pi* satellite                          | 291.1 | 2.97   | 4.15  |
|                                        | Fe-OOH                                    | 530.4 | 2.13   | 41.49 |
|                                        | Fe-OH ads.                                | 531.9 | 2.13   | 50.97 |
|                                        | -OH (ads. H <sub>2</sub> O)               | 533.5 | 2.13   | 7.54  |

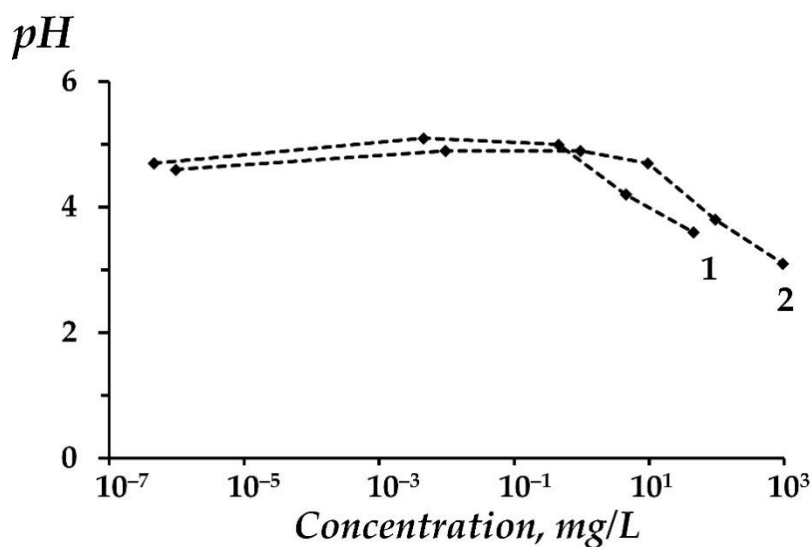

Figure S1. The pH of 3% NaCl solution exposed to nanocomposite of Fe<sub>3</sub>O<sub>4</sub>-MOF nanoparticles functionalized by ascorbic acid, Fe<sub>3</sub>O<sub>4</sub>-AA-MOF (1), and ascorbic acid (2). The pH of 3% NaCl solution (control) was 5.0.

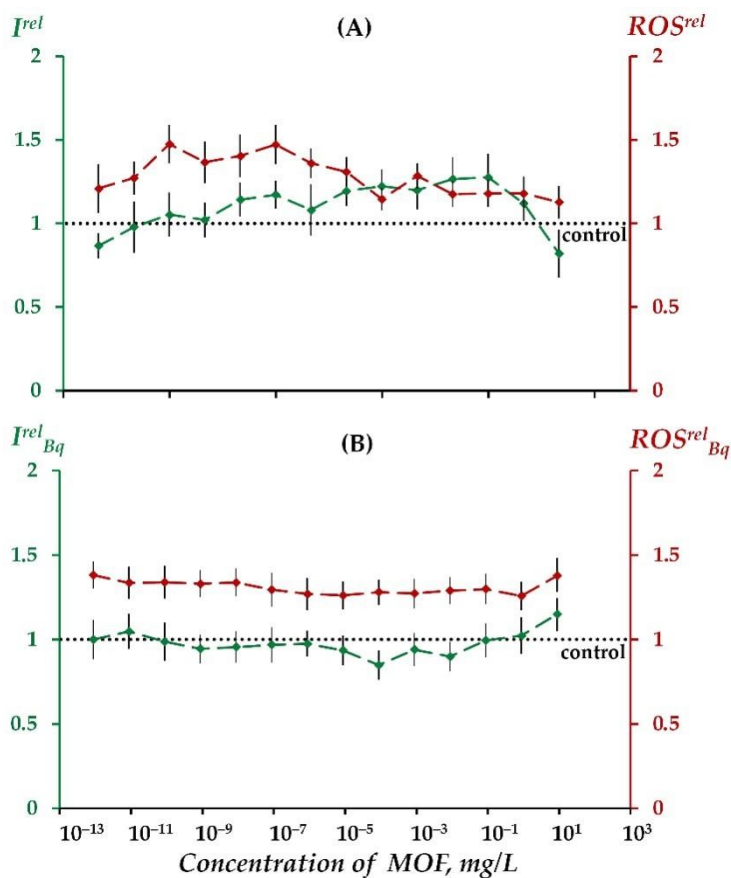

**Figure S2.** Bioluminescence intensity,  $I^{rel}$  (green curves), and ROS content,  $ROS^{rel}$  (red curves), in bacterial suspension vs. concentration of MOF (A) in the absence of 1,4-benzoquinone, (B) in the presence of 1,4-benzoquinone ( $E_{C50}^{Bq}=10^{-7}M$ ). ROS content in the control bacterial suspensions was  $3 \cdot 10^{-7}M$  (A) and  $4 \cdot 10^{-7}M$  (B)
